# Supplementary material for: Genomic data integration and user-defined sample-set extraction for population variant analysis
Source: BMC Bioinformatics. 2022 Sep 29;23:401. doi: 10.1186/s12859-022-04927-0 (PMC9520931; doi:10.1186/s12859-022-04927-0)
Supplement: Supplementary file 2 — Additional file 2. Example of transformed metadata: In this .xlsx (MS Excel) file, we list all the output metadata categories generated for each sample from the transformation of the 1KGP input datasets. The output metadata include information collected from all the four 1KGP metadata files considered. Some categories are not reported in the source metadata files—they are identified by the label manually_curated__...—and were added by the developed pipeline to store technical details (e.g., download date, the md5 hash of the source file, file size, etc.) and information derived from the knowledge of the source, such as the species, the processing pipeline used in the source and the health status. For every information category, the table reports a possible value. The third column (cardinality > 1) tells whether the same key can appear multiple times in the output GDM metadata file. This is used to represent multi-valued metadata categories; for example, in a GDM metadata file, the key manually_curated__chromosome appears once for every chromosome mutated by the variants of the sample. [file 12859_2022_4927_MOESM2_ESM.xlsx]

## Sheet: Foglio1
Examples of mutations from 1000 Genomes Project on chromosome X in VCF format. The file describes only the variants relative to the sample HG123456.
Example	#CHROM	POS	REF	ALT	INFO	FORMAT	HG123456
a	X	170752	T	G	VT=SNP	GT	1|1
b	X	673980	TA	T	VT=INDEL	GT	1|0
c	X	297824	T	TC	VT=INDEL	GT	0|1
d	X	288023	T	<CN0>	CIEND=0,135;CIPOS=-150,0;END=290864;SVTYPE=DEL;VT=SV	GT	0|1
e	X	187604	A	<CN0>,<CN2>	END=218561;SVTYPE=CNV;VT=SV	GT	0|2
f.1	X	68498	A	AC,C	VT=SNP,INDEL	GT	0|1
f.2	X	68498	A	AC,C	VT=SNP,INDEL	GT	0|2
Variants of sample HG123456 converted in GDM format
Example	chr	left	right	strand	AL1	AL2	ref	alt	mut_type	length
a	chrX	170751	170752	+	1	1	T	G	SNP	1
b	chrX	673980	673981	+	1	0	A		DEL	1
c	chrX	297824	297824	+	0	1		C	INS	1
d	chrX	288023	290864	+	0	1		<CN0>	DEL	2841
e	chrX	187604	218561	+	0	1		<CN2>	CNV	30957
f.1	chrX	68498	68498	+	0	1		C	INS	1
f.2	chrX	68497	68498	+	0	1	A	C	SNP	1
